# Supplementary material
Source: PubMed Central journal article supplement (PMC4990470)
Supplement: NIHMS788511-supplement-1.pdf [file NIHMS788511-supplement-1.pdf]

## Supplementary Information

### **A calcium-dependent acyltransferase that produces *N*-acyl phosphatidylethanolamines**

Yuji Ogura, William H. Parsons, Siddhesh S. Kamat, Benjamin F. Cravatt\*

Department of Chemical Physiology and The Skaggs Institute for Chemical

Biology, The Scripps Research Institute, 10550 N. Torrey Pines Rd.,

La Jolla, CA 92037

\*To whom correspondence should be addressed: [cravatt@scripps.edu](mailto:cravatt@scripps.edu)

## **Supplementary Results**

### **Table of Contents**

|                                   |      |
|-----------------------------------|------|
| <b>Supplementary Figures 1-13</b> | 3-16 |
| <b>Supplementary Table 1</b>      | 17   |
| • See also separate Excel file    |      |
| <b>Supplementary References</b>   | 17   |

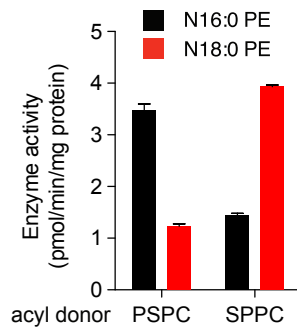

**Supplementary Figure 1.** Measure of *sn*-1 vs. *sn*-2 specificity for Ca-NAT activity in mouse brain membrane lysates. Lysates were incubated with *sn*-1, *sn*-2-dioleoyl-phosphatidylethanolamine (DOPE, 250  $\mu$ M) and either *sn*-1-palmitoyl-*sn*-2-stearoyl phosphatidylcholine (PSPC) or *sn*-1-stearoyl-*sn*-2-palmitoyl phosphatidylcholine (SPPC) for 1 h at 37  $^{\circ}$ C with CaCl<sub>2</sub> (3 mM). The *N*-C16:0 DOPE and *N*-C18:0 DOPE products were measured. Data represent mean values  $\pm$  s. d. for 3 biological replicates.

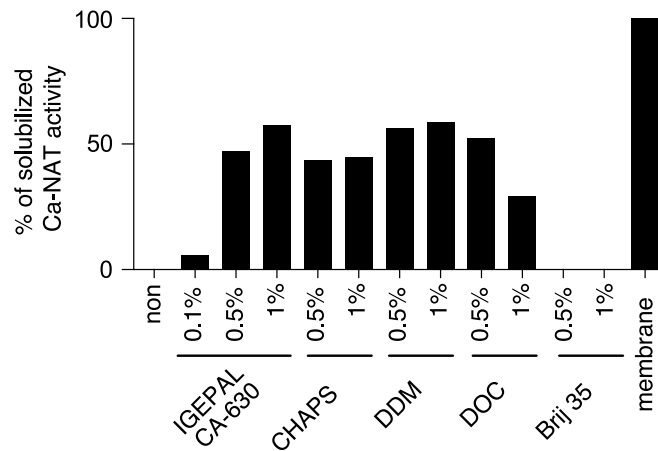

**Supplementary Figure 2.** Solubilizing Ca-NAT activity in the membrane fraction of mouse brain. Solubilized mouse brain membrane proteome was prepared with the indicated detergent, and its Ca-NAT activity was determined by incubating 40  $\mu\text{g}$  of proteome with 250  $\mu\text{M}$  DPPC, 250  $\mu\text{M}$  DOPE, and 3 mM  $\text{CaCl}_2$  for 1 h at 37  $^\circ\text{C}$  and measuring *N*-C16:0 DOPE production.

a

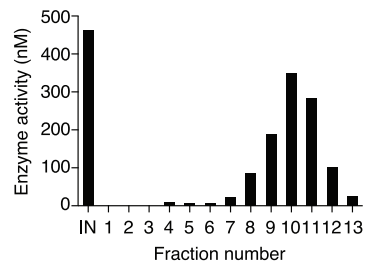

b

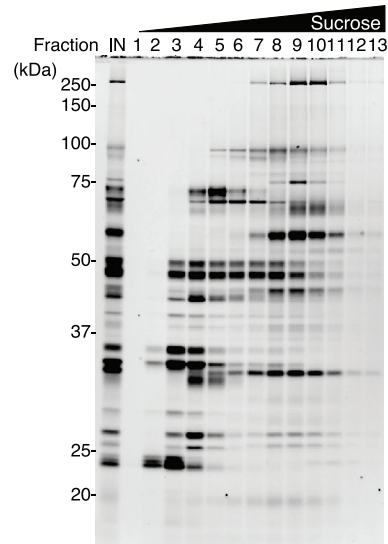

**Supplementary Figure 3.** Analysis of fractions from sucrose gradient centrifugation of mouse brain membrane lysates. **(a)** Ca-NAT activity of fractions obtained by sucrose gradient (5-40%) centrifugation of detergent-solubilized mouse brain membrane lysates. Fractions were incubated with *sn*-1, *sn*-2-dipalmitoyl-phosphatidylcholine (DPPC; 250  $\mu$ M) and *sn*-1, *sn*-2-dioleoyl-phosphatidylethanolamine (DOPE, 250  $\mu$ M) for 1 h at 37  $^{\circ}$ C with or without  $\text{CaCl}_2$  (3 mM). The production of *N*-C16:0 DOPE was measured, and Ca-independent activities were subtracted in the calculations of Ca-dependent activity. Data represent activity measurements from one experiment representative of two biological replicates. **(b)** Gel-based ABPP of fractions, showing differential distribution of serine hydrolase activities detected by reactions with FP-rhodamine (1  $\mu$ M, 30 min at 25  $^{\circ}$ C).

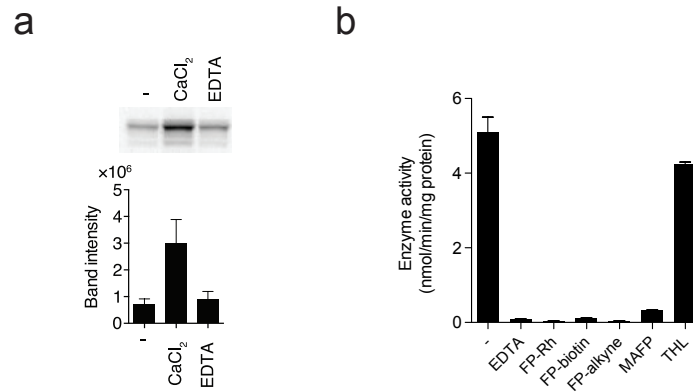

**Supplementary Figure 4.** Analysis of recombinant mouse PLA2G4E activity. **(a)** Gel-based ABPP analysis demonstrating calcium-enhanced FP-rhodamine labeling of recombinant mouse PLA2G4E in transfected, detergent-solubilized HEK293T cell lysates. The bands shown for PLA2G4E are from the full gel shown in **Figure 2a**. Band intensities were quantified using Image Lab software (BIO-RAD). Data represent mean values  $\pm$  s. d. for 3 biological replicates. **(b)** Inhibitor sensitivity of Ca-NAT activity for recombinant PLA2G4E. PLA2G4E-transfected HEK293T lysate (+ 3 mM CaCl<sub>2</sub>) was treated with or without EDTA (10  $\mu$ M) or pre-treated with MAFP (3  $\mu$ M), FP probes (1  $\mu$ M), or THL (3  $\mu$ M) for 30 min at 25 °C. *N*-C16:0 DOPE production was then measured in reactions with DPPC (40  $\mu$ M) and DOPE (75  $\mu$ M) for 30 min at 37 °C. Data represent mean values  $\pm$  s. d. for 3 biological replicates.

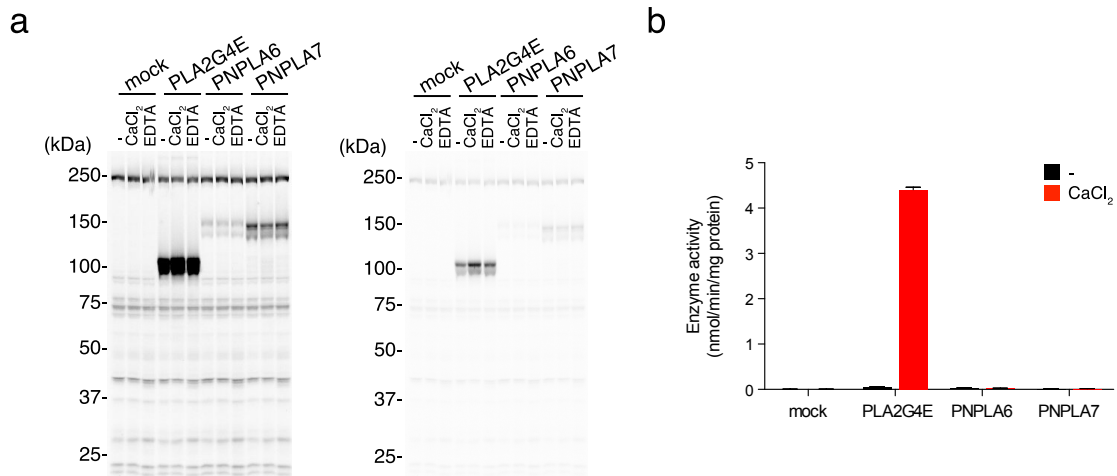

**Supplementary Figure 5.** Ca-NAT activity for recombinant PLA2G4E, PNPLA6, and PNPLA7. **(a)** ABPP gel (left: 60 sec exposure; right: 2 sec exposure) demonstrating overexpression of mouse PLA2G4E, mouse PNPLA6, and mouse PNPLA7 in HEK293T cells. Proteomes were incubated with 1  $\mu$ M FP-Rh for 30 min at 25  $^{\circ}$ C in the presence or absence of 3 mM CaCl<sub>2</sub> or 10 mM EDTA. **(b)** Ca-NAT activity of transfected HEK293T lysates as measured by *N*-C16:0 DOPE production. 2  $\mu$ g of proteome was incubated with 40  $\mu$ M DPPC and 75  $\mu$ M DOPE for 30 min at 37  $^{\circ}$ C in the presence or absence of 3 mM CaCl<sub>2</sub>. Data represent mean values  $\pm$  s. d. for 3 biological replicates.

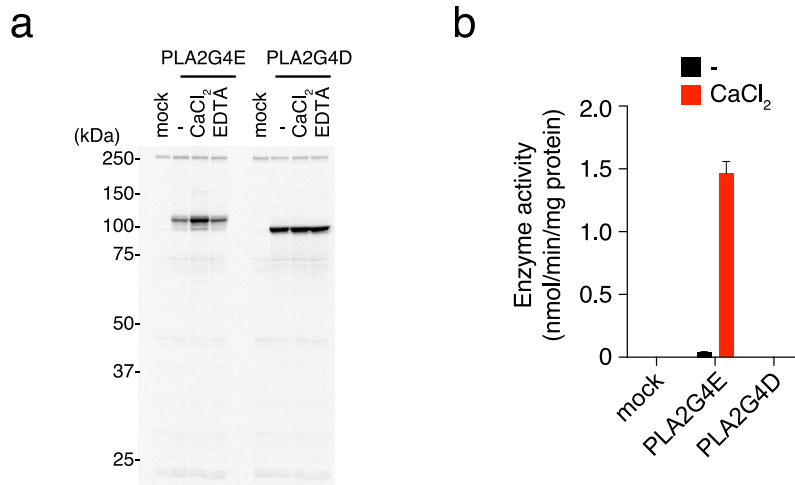

**Supplementary Figure 6.** Ca-NAT activity for recombinant PLA2G4E versus PLA2G4D. **(a)** ABPP gel demonstrating overexpression of mouse PLA2G4E and mouse PLA2G4D in HEK293T cells. Proteomes were incubated with 1  $\mu$ M FP-Rh for 30 min at 37  $^{\circ}$ C in the presence or absence of 3 mM CaCl<sub>2</sub> or 10 mM EDTA. **(b)** Ca-NAT activity of transfected HEK293T lysates as measured by *N*-C16:0 DOPE production. 2  $\mu$ g of proteome was incubated with 40  $\mu$ M DPPC and 75  $\mu$ M DOPE for 30 min at 37  $^{\circ}$ C in the presence or absence of 3 mM CaCl<sub>2</sub>. Data represent mean values  $\pm$  s. d. for 3 biological replicates.



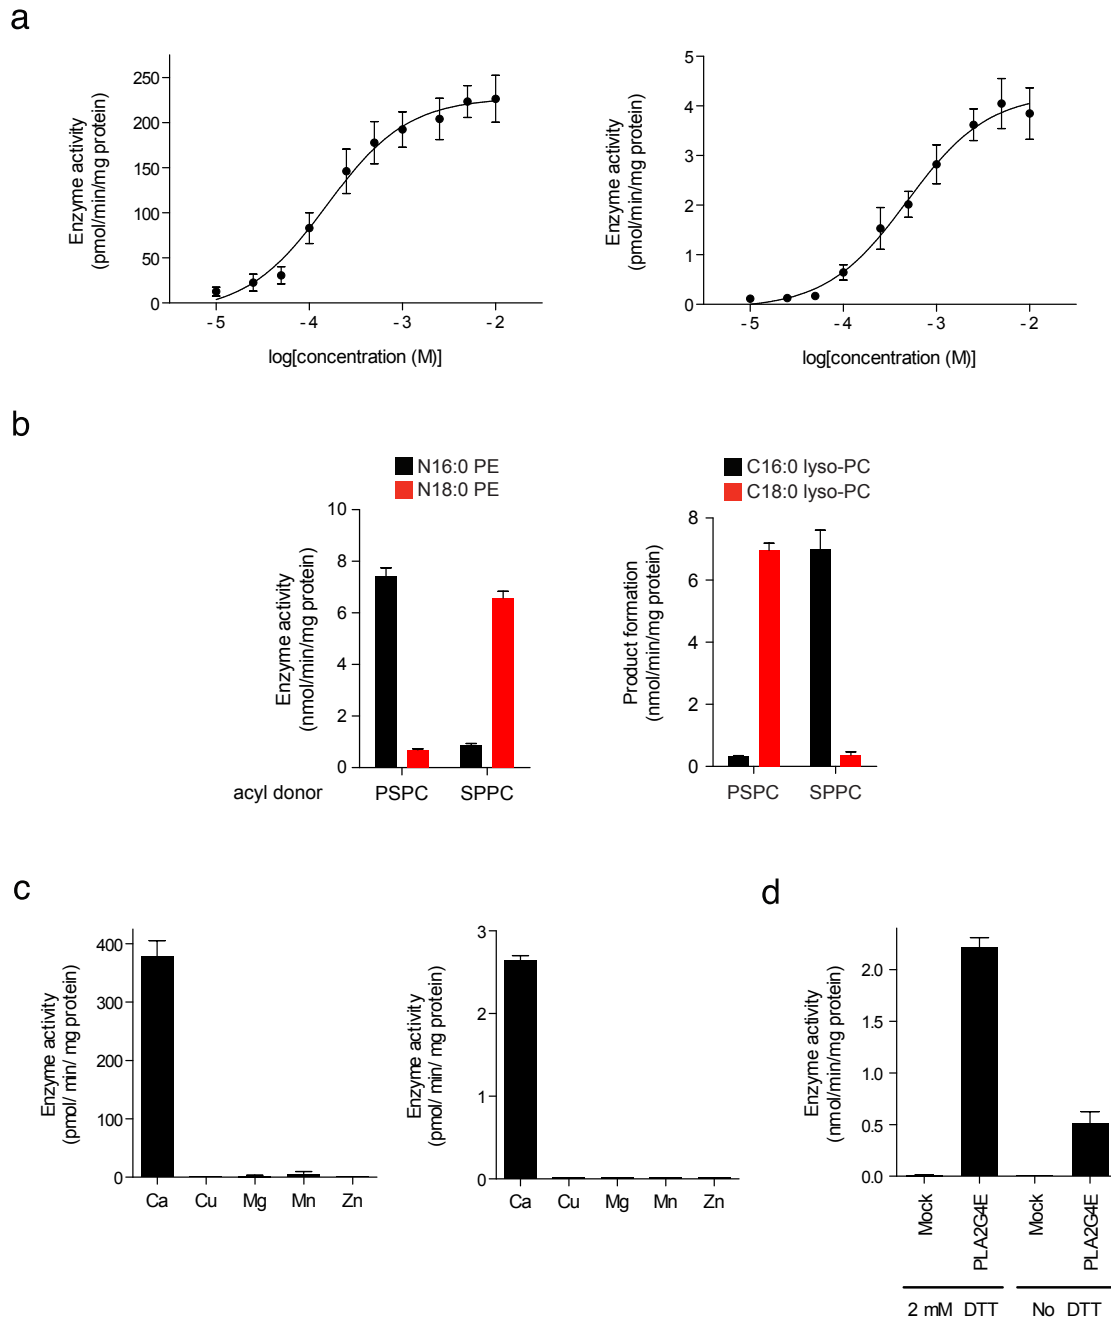

**Supplementary Figure 7.** Calcium-dependence and acyl chain selectivity of PLA2G4E. **(a)** Calcium concentration-response curves for the detergent-solubilized membrane fractions of PLA2G4E-transfected HEK293T cells (left) and mouse brain (right). 40  $\mu\text{g}$  of proteome was incubated with 250  $\mu\text{M}$  DPPC and 250  $\mu\text{M}$  DOPE for 1 h at 37  $^{\circ}\text{C}$  in the presence of the indicated concentration of  $\text{CaCl}_2$ . Enzyme activity was determined by measuring the production of *N*-C16:0 DOPE. An  $\text{EC}_{50}$  of 0.16 mM  $\text{CaCl}_2$  (95% confidence intervals of 0.08-0.29 mM) was determined for recombinant PLA2G4E and an  $\text{EC}_{50}$  of 0.49 mM  $\text{CaCl}_2$  (95% confidence intervals of 0.28-0.85 mM) for mouse brain. **(b)** Production of *N*-

C16:0 DOPE and *N*-C18:0 DOPE (left) and C16:0 lyso-PC and C18:0 lyso-PC (right) by PLA2G4E. 2 µg of proteome from PLA2G4E-transfected HEK293T cells was incubated with 75 µM DOPE and 40 µM of either *sn*-1-palmitoyl-*sn*-2-stearoyl phosphatidylcholine (PSPC) or *sn*-1-stearoyl-*sn*-2-palmitoyl phosphatidylcholine (SPPC) for 30 min at 37 °C in the presence of 3 mM CaCl<sub>2</sub>. (c) Production of *N*-C16:0 DOPE by detergent-solubilized membrane fractions of PLA2G4E-transfected HEK293T cells (left) and mouse brain (right) in the presence of divalent cations. 40 µg of proteome was incubated with 250 µM DPPC and 250 µM DOPE for 1 h at 37 °C in the presence of 10 mM of the chloride salt of the indicated cation. (d) Effect of DTT on the Ca-NAT activity of PLA2G4E. 2 µg of proteome from PLA2G4E-transfected HEK293T cells was incubated with 40 µM of DPPC and 75 µM DOPE for 30 min at 37 °C in the presence of 3 mM CaCl<sub>2</sub> with or without the addition of 2 mM DTT. For assays with recombinant PLA2G4E in a and c, 4 µg of proteome from PLA2G4E-transfected HEK293T cells was combined with 36 µg of proteome from mock-transfected HEK293T cells. Data for a-d represent mean values ± s. d. for 3 biological replicates.

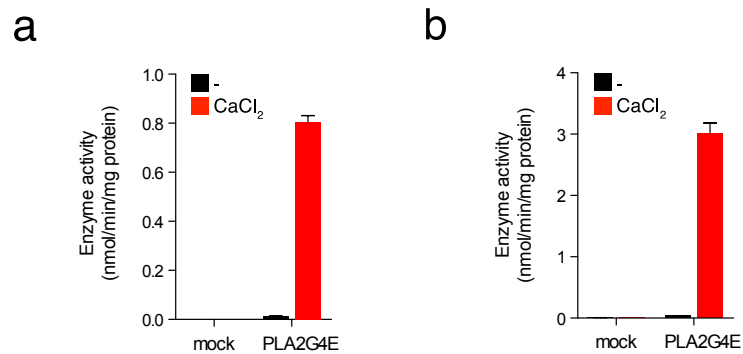

**Supplementary Figure 8.** Recombinant PLA2G4E generates the anandamide precursor *N*-C20:4 NAPE and can use phosphatidylethanolamine (PE) as an acyl donor. **(a)** Production of *N*-C20:4 DOPE by PLA2G4E. 2  $\mu$ g of lysate was incubated with 40  $\mu$ M *sn*-1, *sn*-2-diarachidonoyl-phosphatidylcholine and 75  $\mu$ M DOPE for 30 min at 37  $^{\circ}$ C in the presence or absence of 3 mM CaCl<sub>2</sub>. **(b)** Production of *N*-C18:1 DOPE from dioleoyl PE (DOPE) by PLA2G4E. 2  $\mu$ g of lysate was incubated with 75  $\mu$ M DOPE alone for 30 min at 37  $^{\circ}$ C in the presence or absence of 3 mM CaCl<sub>2</sub>. Data for **a** and **b** represent mean values  $\pm$  s. d. for 3 biological replicates.

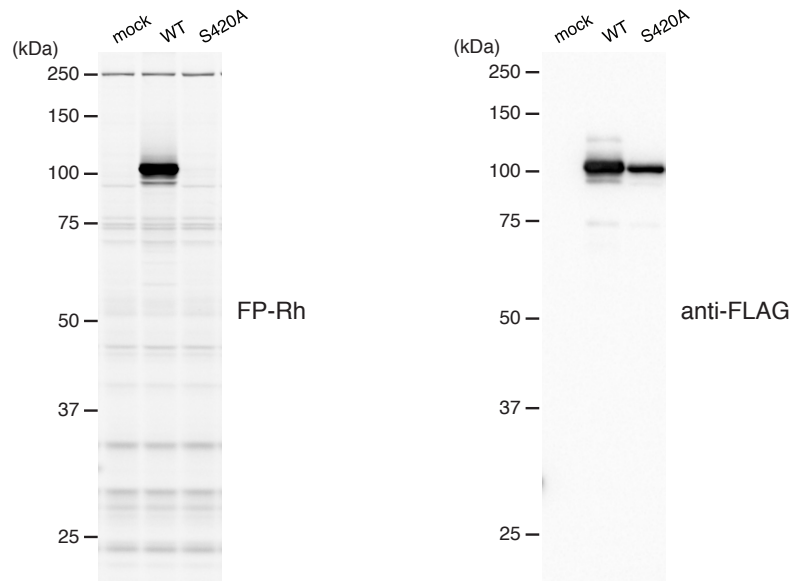

**Supplementary Figure 9.** Gel-based ABPP and Western blot analyses of transfected HEK293T proteomes ( $0.3 \text{ mg mL}^{-1}$ ) showing selective labeling by FP-rhodamine ( $1 \text{ } \mu\text{M}$ ) of WT-PLA2G4E but not the S420A mutant.

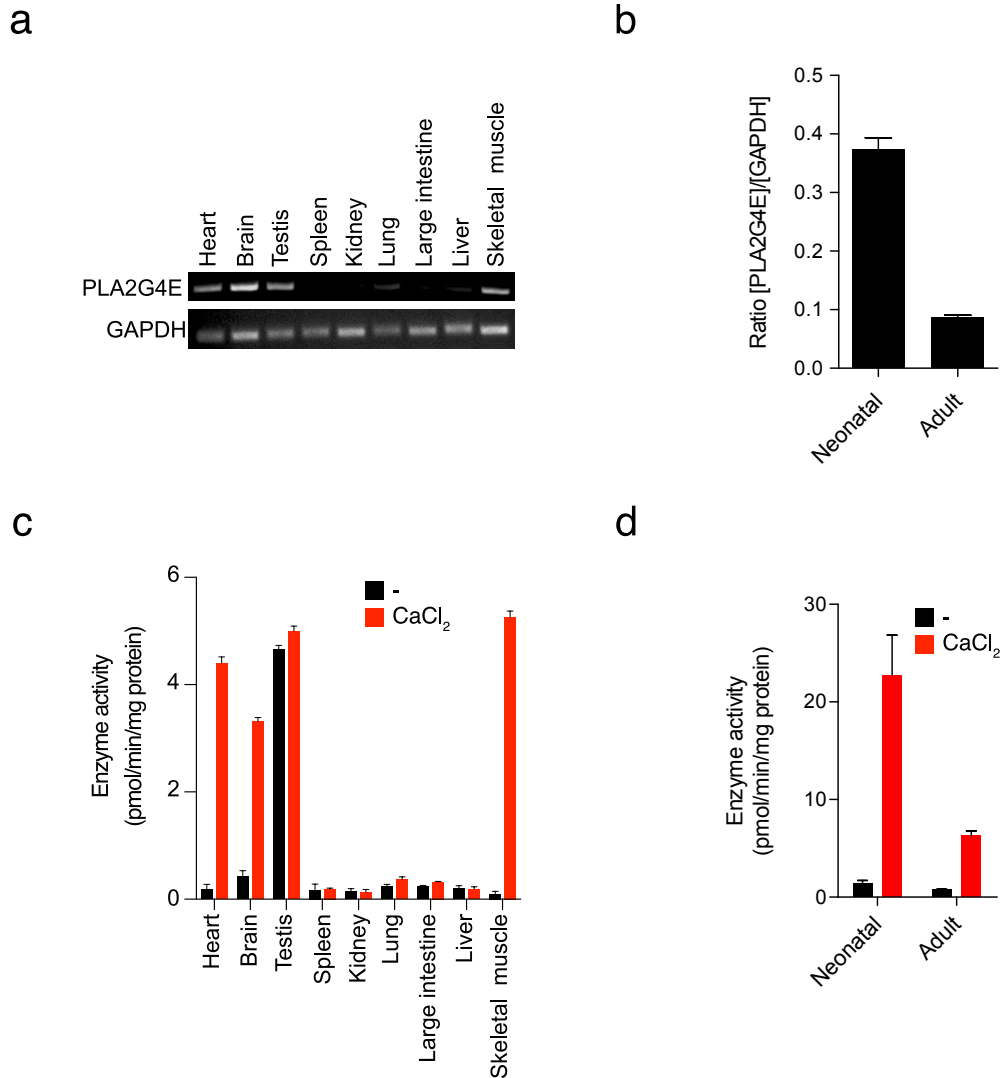

**Supplementary Figure 10.** Distribution of PLA2G4E expression and Ca-NAT activity in mouse tissues. **(a)** RT-PCR analysis of PLA2G4E expression in nine different mouse tissues. GAPDH was used as a standard. **(b)** RT-PCR analysis of PLA2G4E expression in neonatal (day 1 post-natal) and adult male (10-week-old) mouse brain. Data represent mean values  $\pm$  s. d. for 4 biological replicates. GAPDH was used as a standard. **(c)** Ca-NAT activity of mouse tissue proteomes as measured by *N*-C16:0 DOPE production. 40  $\mu$ g of proteome was incubated with 250  $\mu$ M DPPC and 250  $\mu$ M DOPE for 1 h at 37  $^{\circ}$ C in the presence and absence of 3 mM CaCl<sub>2</sub>. Data represent mean values  $\pm$  s. d. for 3 biological replicates. **(d)** Ca-NAT activity of brain proteomes from neonatal and adult mice as measured by *N*-C16:0 DOPE production. 40  $\mu$ g of proteome was incubated with 250  $\mu$ M DPPC and 250  $\mu$ M DOPE for 1 h at 37  $^{\circ}$ C in the presence and absence of 3 mM CaCl<sub>2</sub>. Data represent mean values  $\pm$  s. d. for 3 biological replicates.

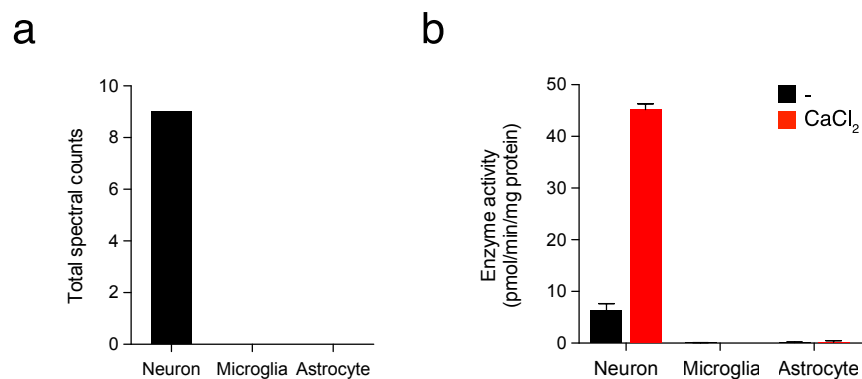

**Supplementary Figure 11.** Distribution of PLA2G4E expression and Ca-NAT activity in mouse brain. **(a)** Spectral counts for PLA2G4E in neurons, microglia, and astrocytes from previous ABPP-MudPIT experiments performed using the FP-biotin probe. Data obtained from experiments described in Ref. 1. **(b)** Ca-NAT activity of lysates prepared from neurons, microglia, and astrocytes as measured by *N*-C16:0 DOPE production. 2.5  $\mu$ g of proteome was incubated with 40  $\mu$ M DPPC and 75  $\mu$ M DOPE for 1 h at 37  $^{\circ}$ C in the presence or absence of 3 mM CaCl<sub>2</sub> or 10 mM EDTA. Data represent mean values  $\pm$  s. d. for 3 biological replicates.

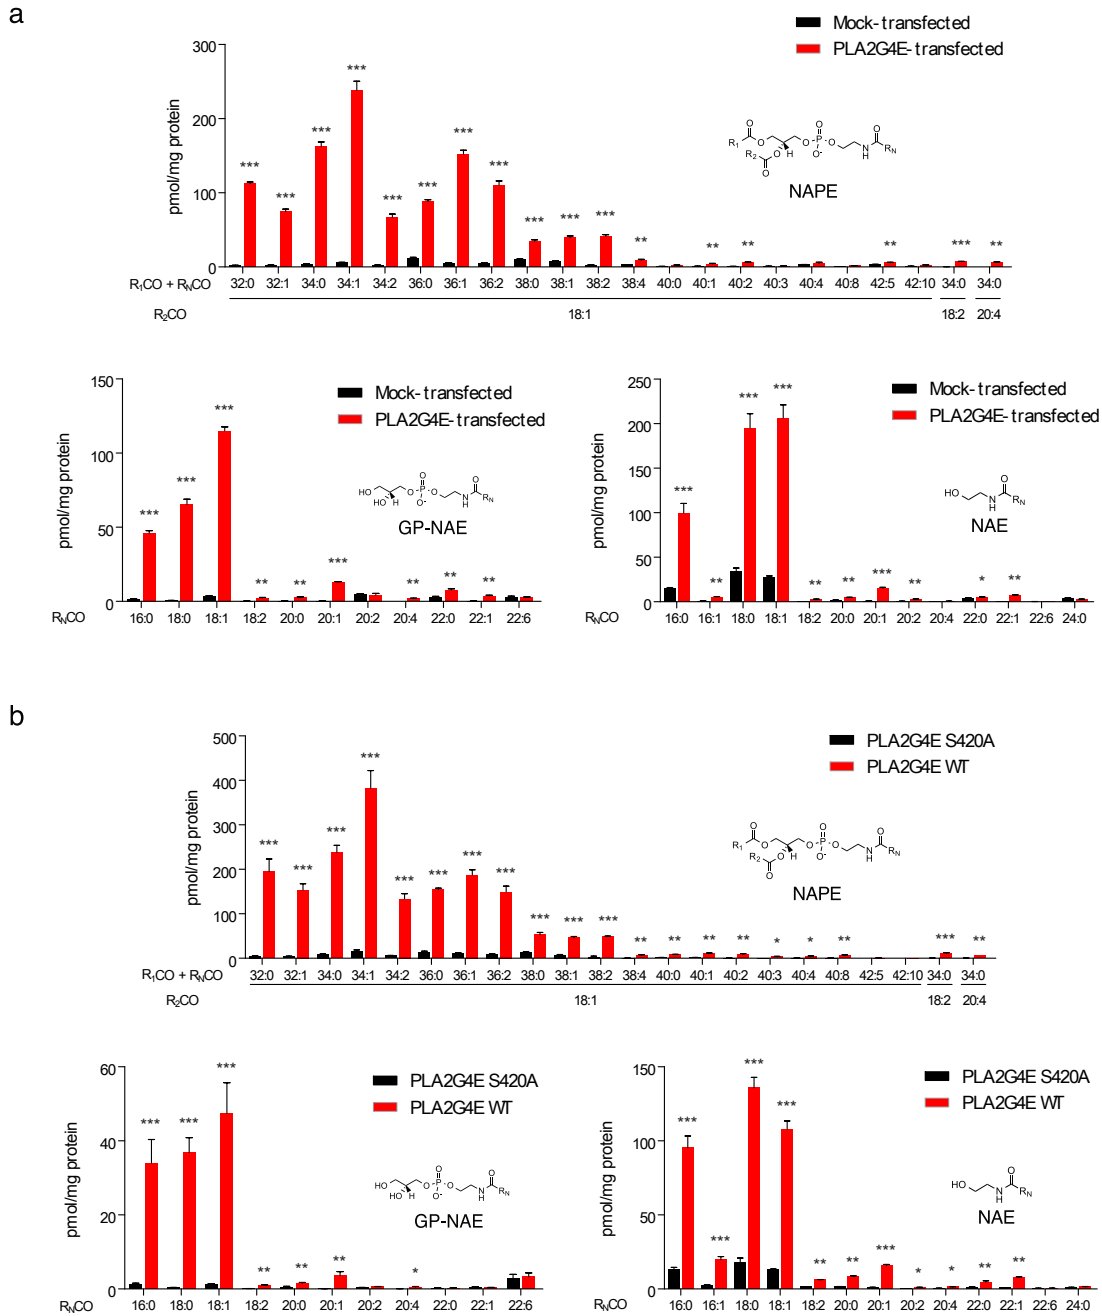

**Supplementary Figure 12.** Production of NAPEs, GP-NAEs, and NAEs in transfected HEK293T cells. **(a)** Comparison of lipids from cells transfected with either WT PLA2G4E or empty vector (mock). 48 h after transfection, lipids were extracted and analyzed by LC-MS/MS. **(b)** Comparison of lipids from cells transfected with either WT PLA2G4E or the S420A mutant. Data for **a** and **b** represent mean values  $\pm$  s. d. for 3 biological replicates. \*,  $p < 0.05$ , \*\*,  $p < 0.01$ , \*\*\*  $p < 0.001$  by two-sided Student's *t*-test for WT PLA2G4E-transfected vs either mock- or S420A PLA2G4E-transfected cells.

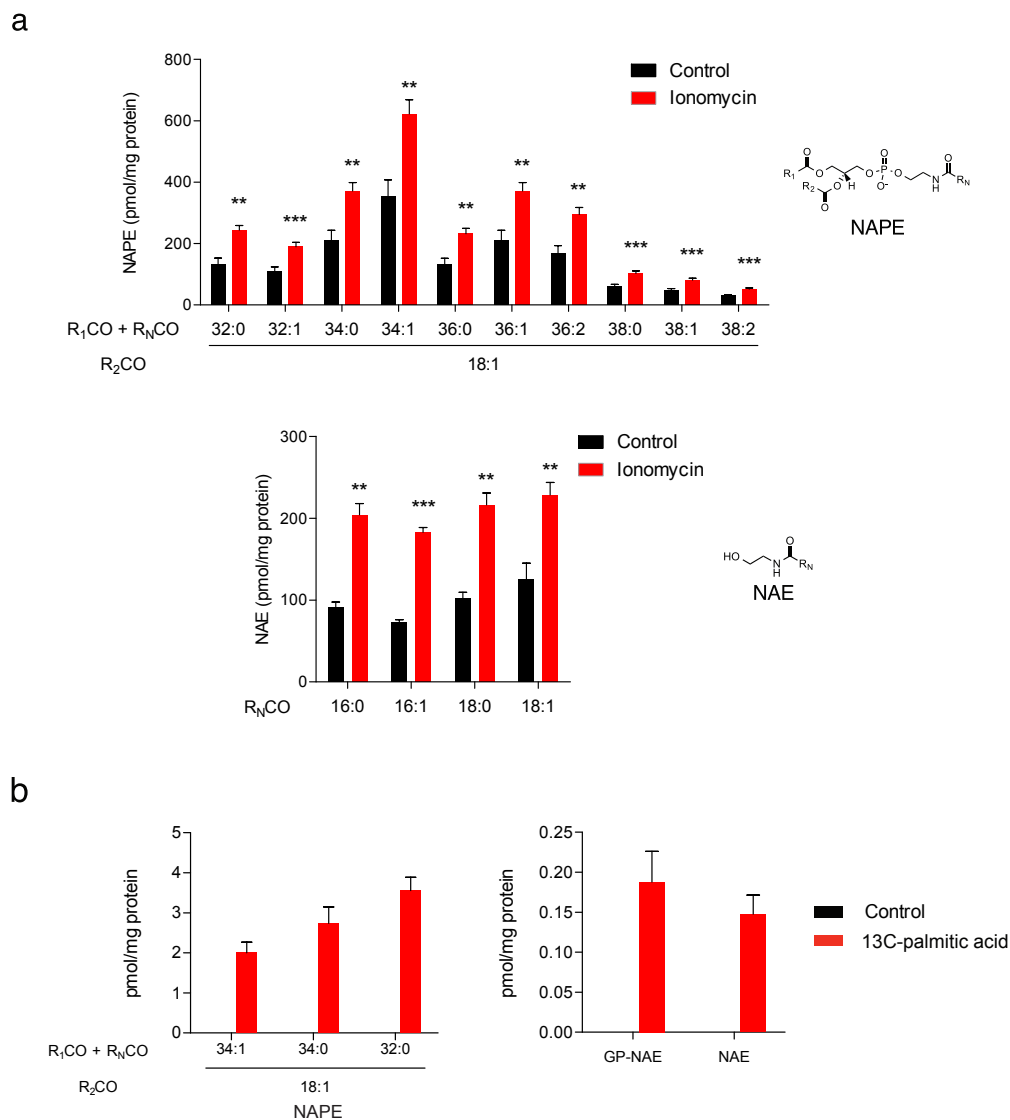

**Supplementary Figure 13.** Production of NAPEs, GP-NAEs, and NAEs in PLA2G4E-transfected HEK293T cells in response to ionomycin treatment or <sup>13</sup>C-palmitic acid feeding. **(a)** Comparison of lipids from PLA2G4E-transfected cells incubated in the presence or absence of 2  $\mu$ M ionomycin for 4 h. Following the incubation, lipids were extracted and analyzed by LC-MS/MS. **(b)** Comparison of <sup>13</sup>C-labeled lipids from PLA2G4E-transfected cells incubated in the presence or absence of <sup>13</sup>C<sub>16</sub>-palmitic acid (250  $\mu$ M) for 4 h. Following the incubation, lipids were extracted and analyzed by LC-MS/MS. Data for **a** and **b** represent mean values  $\pm$  s. d. for 3 biological replicates. \*,  $p < 0.05$ , \*\*,  $p < 0.01$ , \*\*\*  $p < 0.001$  by two-sided Student's *t*-test for ionomycin-treated vs control (DMSO)-treated PLA2G4E-transfected cells.



**Supplementary Table 1.** Complete ABPP-MudPIT data set. See attached Excel file.

Tab 1 ('Serine hydrolases'). Spectral counts for serine hydrolases detected in the ABPP-MudPIT analysis of fractions 2-13 from separation of mouse brain membrane proteome over sucrose gradient. Calculated Pearson correlation coefficients for each serine hydrolase are presented in the far right column.

Tab 2 ('All proteins'). Spectral counts for all proteins detected in the ABPP-MudPIT analysis of fractions 2-13 from separation of mouse brain membrane proteome over sucrose gradient. Calculated Pearson correlation coefficients for each protein are presented in the far right column.

### Supplementary References

- 1 Viader, A.; Ogasawara, D.; Joslyn, C. M.; Sanchez-Alavez, M.; Mori, S.; Nguyen, W.; Conti, B.; Cravatt, B. F. A chemical proteomic atlas of brain serine hydrolases identifies cell type-specific pathways regulating neuroinflammation. *eLife* doi: [10.7554/eLife.12345](https://doi.org/10.7554/eLife.12345) (2016).
